# Supplementary material
Source: publisher figshare collection journal article supplement (https://tandf.figshare.com/ndownloader/files/21655608)
Supplement: Supplementary file 1 [file 21655608]

# **A** *E. coli* RNase P ribozyme

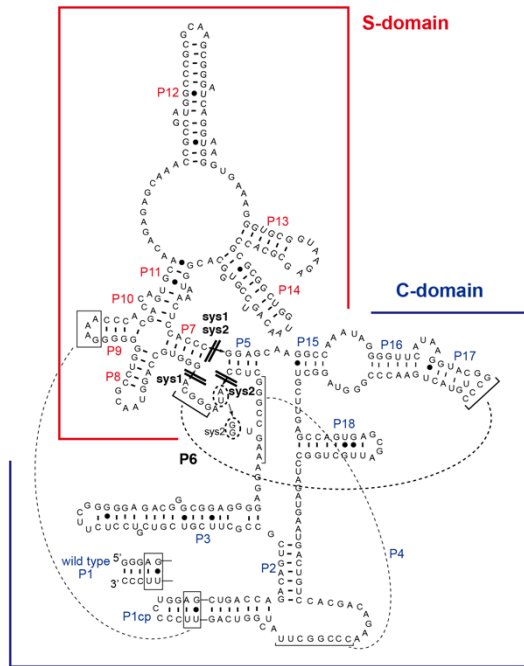

# **B** *B. subtilis* RNase P ribozyme

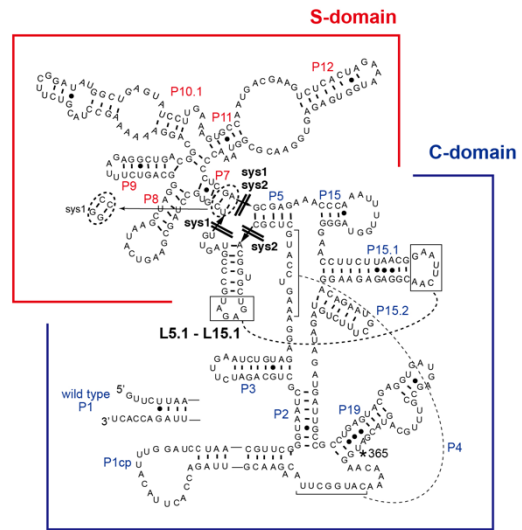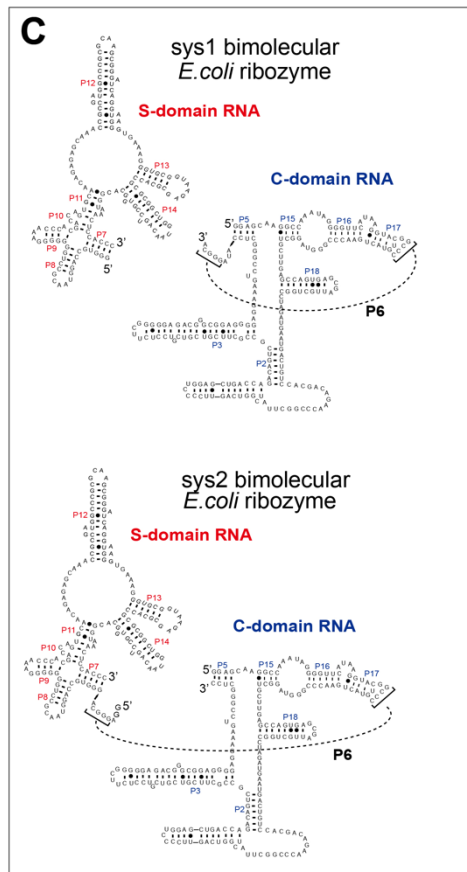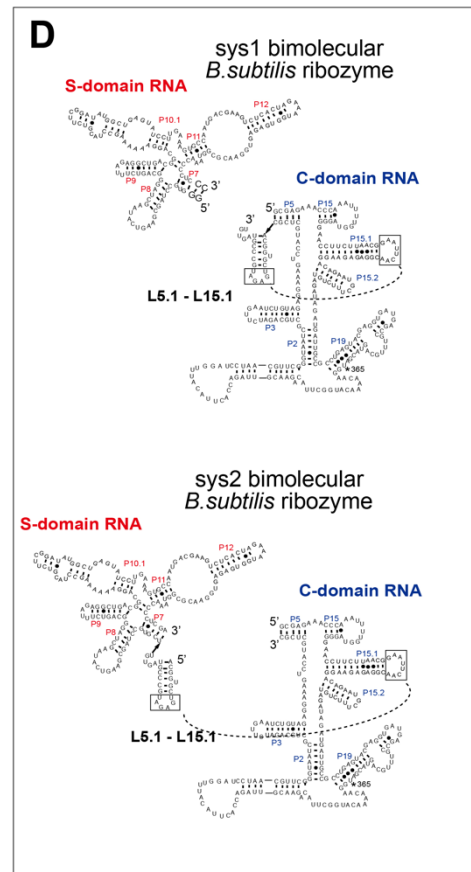

**Figure S1**

Secondary structures of *E. coli* and *B. subtilis* RNase P ribozymes.

(A, B) Nucleotide sequences and secondary structures of the *E. coli* (A) and *B. subtilis* (B) RNase P ribozymes with circular permutation.

(C) The sys-1 (top) and sys-2 (bottom) bimolecular forms of the *E. coli* RNase P ribozyme.

(D) The sys-1 (top) and sys-2 (bottom) bimolecular forms of the *B. subtilis* RNase P ribozyme.

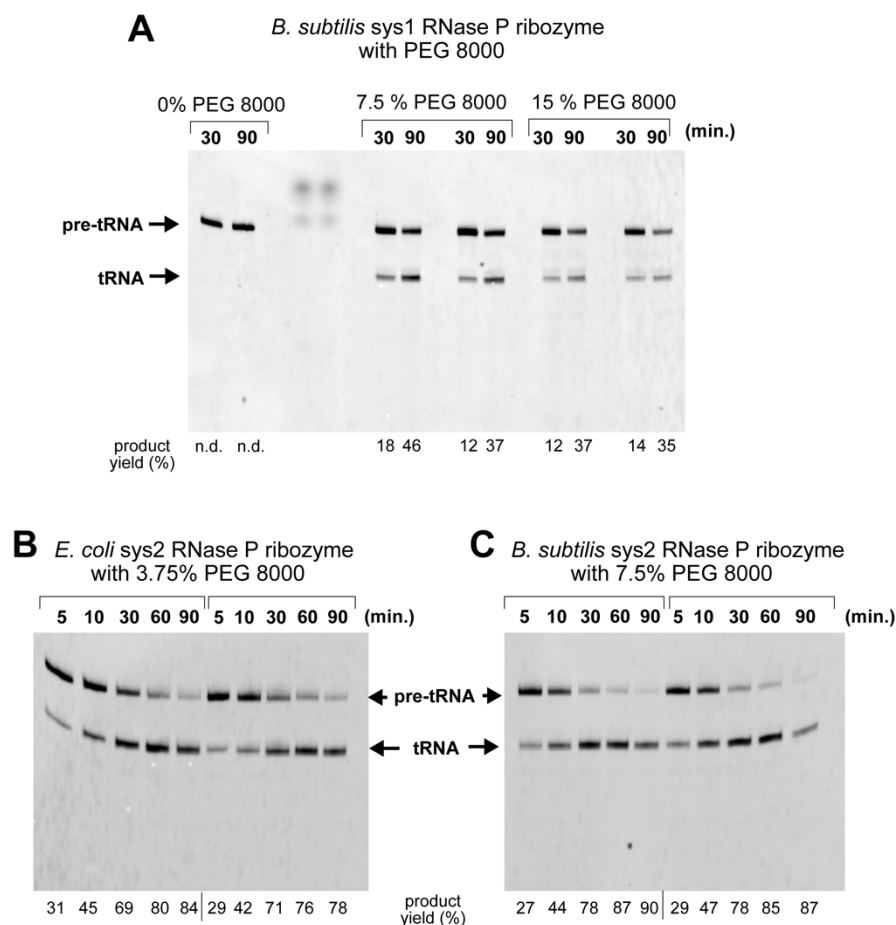

## Figure S2

Typical electrophoresis gels to analyze pre-tRNA cleavage reactions catalyzed by bimolecular RNase P ribozymes.

- (A) A denaturing polyacrylamide gel to analyze effects of PEG 8000 on pre-tRNA cleavage reaction catalyzed by the sys1 *B. subtilis* bimolecular RNase P ribozyme. These data were used to prepare figure 2B.
- (B) A denaturing polyacrylamide gel to analyze pre-tRNA cleavage reaction catalyzed by the sys2 *E. coli* bimolecular RNase P ribozyme in the presence of 3.75% PEG 8000. These data were used to prepare figures 4C and S4B.
- (C) A denaturing polyacrylamide gel to analyze pre-tRNA cleavage reaction catalyzed by the sys2 *B. subtilis* bimolecular RNase P ribozyme in the presence of 7.5% PEG 8000. These data were used to prepare figures 5C and S5B.

**A***B. subtilis* sys1 RNase P ribozyme with 17.5 % PEG 200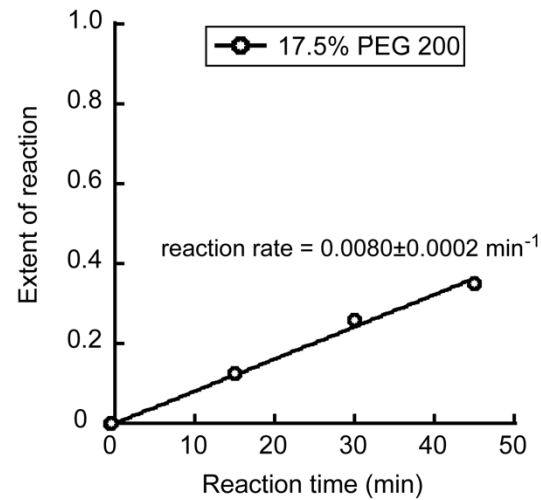**B***B. subtilis* sys1 RNase P ribozyme with 10 % PEG 8000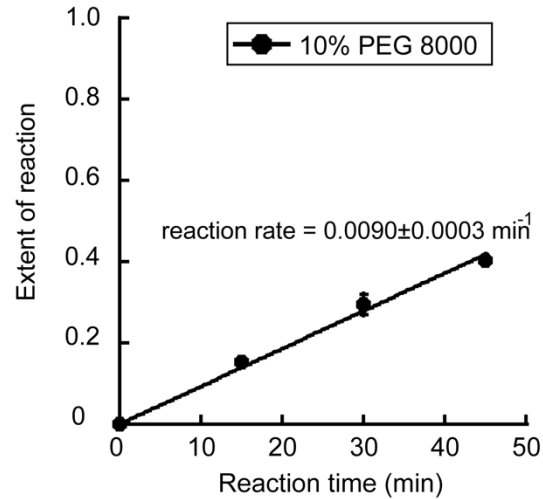**Figure S3**

Time courses of pre-tRNA cleavage reaction catalyzed by the sys1 *B. subtilis* bimolecular RNase P ribozyme.

- (A) Time course of pre-tRNA cleavage reaction catalyzed by the sys1 *B. subtilis* bimolecular RNase P ribozyme in the presence of 17.5% PEG 200.
- (B) Time course of pre-tRNA cleavage reaction catalyzed by the sys1 *B. subtilis* bimolecular RNase P ribozyme in the presence of 10% PEG 8000.

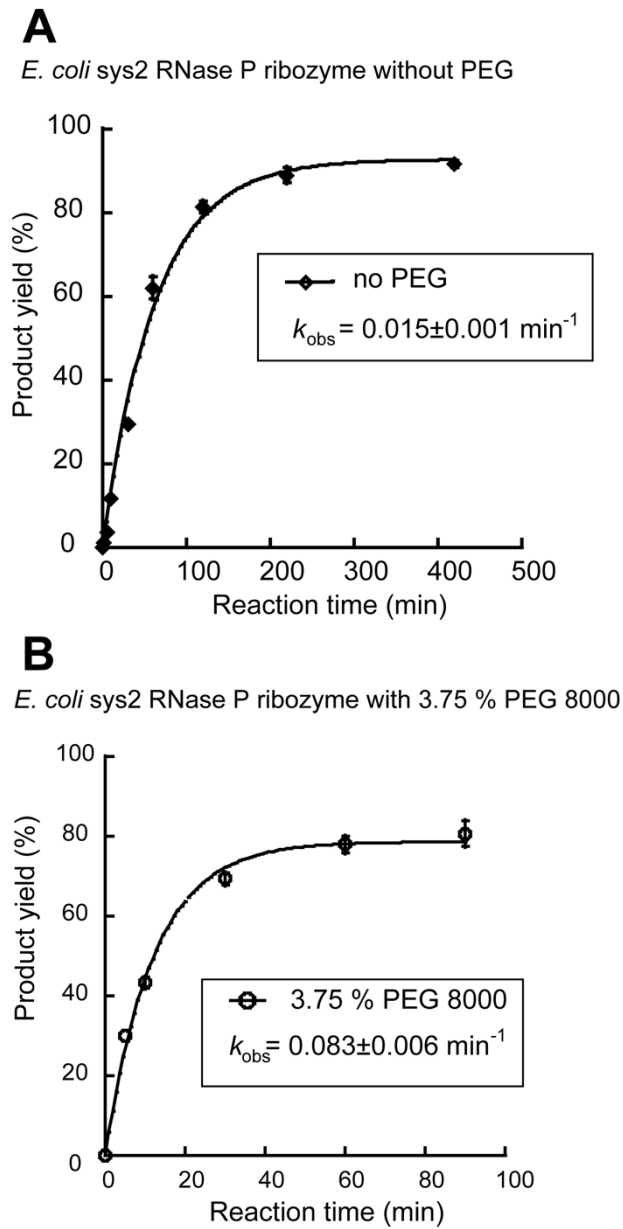

**Figure S4**

Time courses of pre-tRNA cleavage reaction catalyzed by the sys2 *E. coli* bimolecular RNase P ribozyme.

- (A) Time course of pre-tRNA cleavage reaction catalyzed by the sys2 *E. coli* bimolecular RNase P ribozyme in the absence of PEG.
- (B) Time course of pre-tRNA cleavage reaction catalyzed by the sys1 *E. coli* bimolecular RNase P ribozyme in the presence of 3.75% PEG 8000.

**A***B. subtilis* sys2 RNase P ribozyme without PEG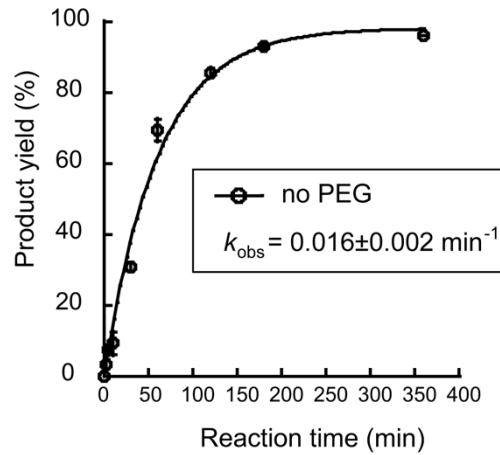**B***B. subtilis* sys2 RNase P ribozyme with 7.5 % PEG 8000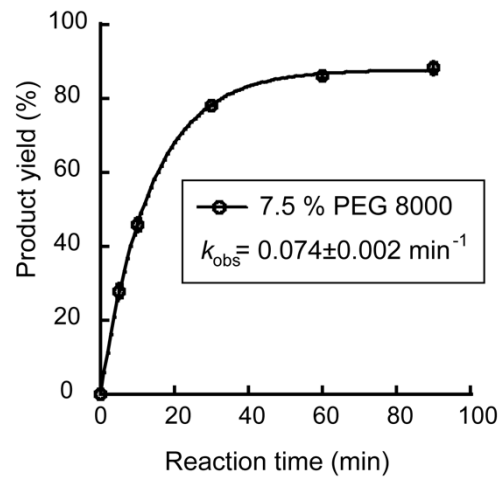**Figure S5**

Time courses of pre-tRNA cleavage reaction catalyzed by the sys2 *B. subtilis* bimolecular RNase P ribozyme.

- (A) Time course of pre-tRNA cleavage reaction catalyzed by the sys2 *B. subtilis* bimolecular RNase P ribozyme in the absence of PEG.
- (B) Time course of pre-tRNA cleavage reaction catalyzed by the sys2 *B. subtilis* bimolecular RNase P ribozyme in the presence of 7.5% PEG 8000.

**Table S1** Rate constants of the reactions with the sys2 *E. coli* ribozyme.

| <b>Ribozyme</b>     | <b>PEG (w/v %)</b> | <b><math>k_{\text{obs}}</math> (min<sup>-1</sup>)</b> | <b>calculated final product yield (%)</b> |
|---------------------|--------------------|-------------------------------------------------------|-------------------------------------------|
| sys2 <i>E. coli</i> | PEG 200 (10%)      | $0.15 \pm 0.014$                                      | 89                                        |
| sys2 <i>E. coli</i> | PEG 8000 (3.75%)   | $0.083 \pm 0.007$                                     | 78                                        |
| sys2 <i>E. coli</i> | no PEG             | $0.015 \pm 0.001$                                     | 92                                        |

**Table S2** Rate constants of the reactions with the sys2 *B. subtilis* ribozyme.

| <b>Ribozyme</b>         | <b>PEG (w/v %)</b> | <b><math>k_{\text{obs}}</math> (min<sup>-1</sup>)</b> | <b>calculated final product yield (%)</b> |
|-------------------------|--------------------|-------------------------------------------------------|-------------------------------------------|
| sys2 <i>B. subtilis</i> | PEG 200 (12.5%)    | $0.22 \pm 0.03$                                       | 88                                        |
| sys2 <i>B. subtilis</i> | PEG 8000 (7.5%)    | $0.074 \pm 0.002$                                     | 87                                        |
| sys2 <i>B. subtilis</i> | no PEG             | $0.016 \pm 0.002$                                     | 98                                        |
